# Supplementary material for: Difference in Healthcare Resource Utilization and Health-Related Quality of Life between Patients with Major Depressive Disorder (MDD) and Treatment-Resistant Depression (TRD) in a Public Hospital in Malaysia – A Retrospective Case-Note Review and Cross-Sectional Survey
Source: Research Square preprint supplement (doi:10.21203/rs.3.rs-4929054/v1), 2024-10-14
Supplement: Supplementary file 1 [file 7bec8c6f84b367ca05b1a264.docx]

**SUPPLEMENTARY MATERIAL**

*Patient’s socio-demographic profile and non-healthcare use:* Residential postcode, marital status, highest education level, mode of transportation, employment status, monthly income, healthcare coverage funding and availability of private medical insurance

*Work productivity:* Work productivity and activity impairment (WPAI) and classroom impairment questionnaire (CIQ).

*Health-Related Quality of Life:* 36-item short- form (SF-36) health survey

*Caregiver’s socio-demographic profile*: Age, gender, relationship with patient, marital status, highest education level, employment, monthly income, unpaid caregiving activities.

*Caregiving interview questionnaires*: Family Experiences Interview Schedule (FEIS) and Involvement Evaluation Questionnaire (IEQ), and work productivity and activity impairment: mood and mental state, caregiver version (WPAI: MM-CG)
